# Supplementary material
Source: ML conference proceedings conference paper supplement (https://proceedings.neurips.cc/paper_files/paper/2012/hash/43cca4b3de2097b9558efefd0ecc3588-Abstract.html)
Supplement: Supplementary file 1 [file 43cca4b3de2097b9558efefd0ecc3588-Supplemental.zip]

000  
001  
002  
003  
004  
005  
006  
007  
008  
009  
010  
011  
012  
013  
014  
015  
016  
017  
018  
019  
020  
021  
022  
023  
024  
025  
026  
027  
028  
029  
030  
031  
032  
033  
034  
035  
036  
037  
038  
039  
040  
041  
042  
043  
044  
045  
046  
047  
048  
049  
050  
051  
052  
053

# Supplementary Material

Anonymous Author(s)  
Affiliation  
Address  
email

## Appendix: Parameter Sensitivity

Each of our non-linear extensions adds one additional hyper parameter to the LMNN problem. In section 6, we set these parameters by evaluation on a hold-out set. Here we explicitly examine their effect on the learned metric. For GB-LMNN, the new hyper-parameter is the regression tree depth. Figure 3(left) compares depths 4–7 for several of the datasets evaluated in section 6. The figure depicts the ratio of  $k$ NN classification error for each depth setting to the  $k$ NN error of linear LMNN. GB-LMNN appears to be largely insensitive to tree depth within range.

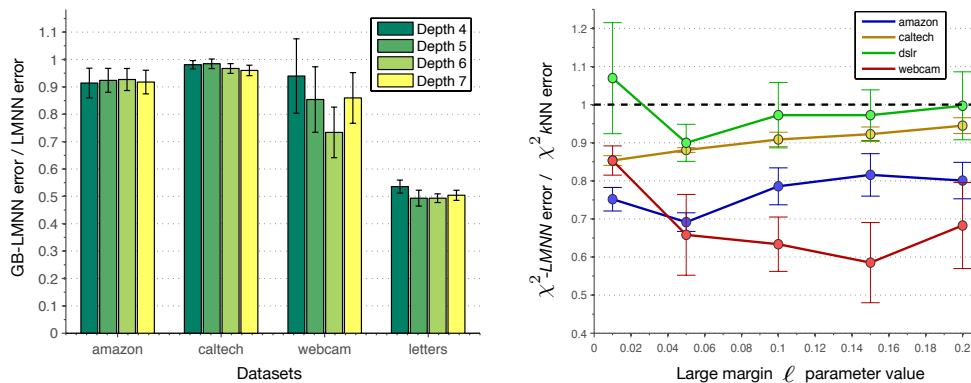

Figure 3: Parameter sensitivity measurements. *Left*: Varying tree depth for GB-LMNN. The measurement is the ratio between GB-LMNN error and LMNN error (lower is better). *Right*: Varying the large margin  $\ell$  for  $\chi^2$ -LMNN. The measurement is the ratio between  $\chi^2$ -LMNN error and the  $\chi^2$  baseline error (lower is better).

For  $\chi^2$ -LMNN, the additional hyper-parameter is the size of the large margin. Figure 3(right) examines several margin values: 0.01, 0.05, 0.10, 0.15 and 0.20. The figure depicts the ratio of  $k$ NN classification error for each margin setting to the  $k$ NN error of the  $\chi^2$  distance baseline. For all but two settings, the transformation learned by  $\chi^2$ -LMNN improves over the  $\chi^2$  baseline, generally by a large extent. However, the margin size parameter is clearly important to achieving the best performance. Fortunately, the parameter seems to be well-behaved and easily set by evaluation on a hold-out set.
